# Supplementary material for: Methanol promoted naphtha catalytic pyrolysis to light olefins on Zn-modified high-silicon HZSM-5 zeolite catalysts
Source: Royal Society of Chemistry journal article supplement (doi:10.1039/c9ra02793a), 2019-01-01
Supplement: c9ra02793a1.pdf [file c9ra02793a1.pdf]

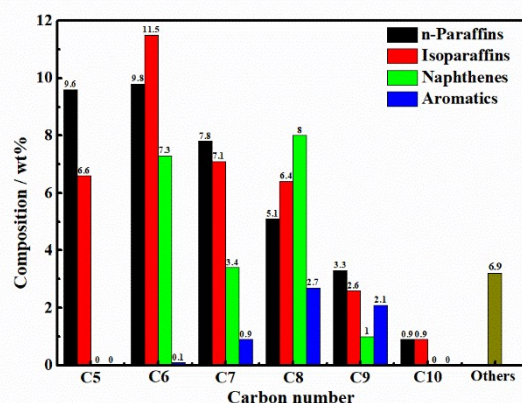

Figure S1 Composition of naphtha

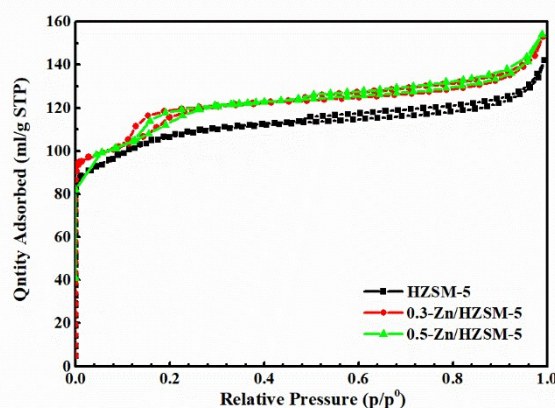

Figure S2 N<sub>2</sub> adsorption-desorption isotherms of HZSM-5 and Zn/HZSM-5 zeolites

There is a significant difference in the shapes of the isotherms of these samples. The HZSM-5 shows a typical type I isotherm for microporous materials with a limited number of mesopore, while the Zn-modified zeolites present a mixture of type I and type IV according to the IUPAC classification<sup>1</sup>. Steep uptake in the low-pressure region ( $p/p_0 < 0.05$ ) is the typical property of microporous compounds. The hysteresis loop appearing at the relative pressure  $p/p_0 = 0.5 \sim 1.0$  is usually associated with capillary condensation taking place in mesopore structures. After Zn-modification, A new H2 hysteresis loop is observed above  $p/p_0 = 0.1 \sim 0.3$ , indicating the presence of some new mesopore in the modified zeolites.

**Table S1 Proton affinities of three components in feed**

| Compound                    | n-hexane | methanol | isobutene | trimethylbenzene |
|-----------------------------|----------|----------|-----------|------------------|
| Proton affinity<br>(kJ/mol) | 665      | 754      | 802       | 836              |

<sup>a</sup> Taken from ref.1

<sup>b</sup> Taken from NIST Chemistry WebBook

## References

(1) Haw JF, Phys Chem Chem Phys., 2002, 4, 5431–5441.
